# Supplementary material for: Utilization of insecticide-treated nets by under-five children in Nigeria: Assessing progress towards the Abuja targets
Source: PubMed Central journal article supplement (PMC2543041; doi:10.1186/1475-2875-7-145), 2008-07-30
Supplement: 1475-2875-7-145-S1.pdf [file 1475-2875-7-145-S1.pdf]

**Socio-demographic characteristics of study households by region**

| Socio-demographic characteristics | Region               |       |                     |       |                      |       |                     |       |                     |       |                      |       |                 |       |
|-----------------------------------|----------------------|-------|---------------------|-------|----------------------|-------|---------------------|-------|---------------------|-------|----------------------|-------|-----------------|-------|
|                                   | South west<br>n=1175 |       | South east<br>n=803 |       | South south<br>n=757 |       | North west<br>n=948 |       | North east<br>n=738 |       | North central n=1167 |       | Total<br>n=5588 |       |
|                                   | n                    | %     | N                   | %     | n                    | %     | n                   | %     | n                   | %     | n                    | %     | n               | %     |
| Residence                         |                      |       |                     |       |                      |       |                     |       |                     |       |                      |       |                 |       |
| Urban                             | 389                  | 33.5  | 12                  | 1.5   | 339                  | 45.6  | 402                 | 47.3  | 121                 | 20.7  | 636                  | 55.2  | 1899            | 36.0  |
| Rural                             | 772                  | 66.5  | 774                 | 98.5  | 405                  | 54.4  | 448                 | 52.7  | 464                 | 79.3  | 517                  | 44.8  | 3380            | 64.0  |
| Total                             | 1161                 | 100.0 | 786                 | 100.0 | 744                  | 100.0 | 850                 | 100.0 | 585                 | 100.0 | 1153                 | 100.0 | 5279            | 100.0 |
| Health facility in community      |                      |       |                     |       |                      |       |                     |       |                     |       |                      |       |                 |       |
| Present                           | 555                  | 48.6  | 646                 | 82.7  | 522                  | 70.0  | 469                 | 57.1  | 391                 | 66.8  | 549                  | 47.7  | 3132            | 59.9  |
| Absent                            | 587                  | 51.4  | 135                 | 17.3  | 224                  | 30.0  | 352                 | 42.9  | 194                 | 33.2  | 602                  | 52.3  | 2094            | 40.1  |
| Total                             | 1142                 | 100.0 | 781                 | 100.0 | 746                  | 100.0 | 821                 | 100.0 | 585                 | 100.0 | 1151                 | 100.0 | 5226            | 100.0 |
| Household wealth index (combined) |                      |       |                     |       |                      |       |                     |       |                     |       |                      |       |                 |       |
| Lowest                            | 233                  | 20.0  | 224                 | 28.2  | 135                  | 18.1  | 292                 | 31.1  | 164                 | 37.4  | 159                  | 14.0  | 1207            | 23.1  |
| 2nd                               | 244                  | 21.0  | 159                 | 20.0  | 146                  | 19.5  | 218                 | 23.2  | 169                 | 38.5  | 270                  | 23.9  | 1206            | 23.1  |
| 3rd                               | 378                  | 32.5  | 188                 | 23.6  | 192                  | 25.7  | 248                 | 26.4  | 66                  | 15.0  | 379                  | 33.5  | 1451            | 27.8  |
| Highest                           | 308                  | 26.5  | 224                 | 28.2  | 274                  | 36.7  | 181                 | 19.3  | 40                  | 9.1   | 324                  | 28.6  | 1351            | 25.9  |
| Total                             | 1163                 | 100.0 | 795                 | 100.0 | 747                  | 100.0 | 939                 | 100.0 | 439                 | 100.0 | 1132                 | 100.0 | 5215            | 100.0 |
| Urban household wealth index      |                      |       |                     |       |                      |       |                     |       |                     |       |                      |       | (n=1899)        |       |
| Lowest                            | 63                   | 16.4  | 1                   | 8.3   | 64                   | 19.0  | 121                 | 30.3  | 29                  | 43.9  | 177                  | 28.5  | 455             | 25.0  |
| 2nd                               | 127                  | 33.0  | 2                   | 16.7  | 84                   | 25.0  | 121                 | 30.3  | 17                  | 25.8  | 186                  | 30.0  | 537             | 29.5  |
| 3rd                               | 95                   | 24.7  | 6                   | 50.0  | 100                  | 29.8  | 78                  | 19.5  | 9                   | 13.6  | 113                  | 18.2  | 401             | 22.0  |
| Highest                           | 100                  | 26.0  | 3                   | 25.0  | 88                   | 26.2  | 79                  | 19.8  | 11                  | 16.7  | 145                  | 23.3  | 426             | 23.4  |
| Total                             | 385                  | 100.0 | 12                  | 100.0 | 336                  | 100.0 | 399                 | 100.0 | 66                  | 100.0 | 621                  | 100.0 | 1819            | 100.0 |
| Rural household wealth index      |                      |       |                     |       |                      |       |                     |       |                     |       |                      |       | (n=3229)        |       |
| Lowest                            | 298                  | 38.9  | 92                  | 12.0  | 153                  | 38.0  | 199                 | 44.7  | 109                 | 31.7  | 126                  | 25.0  | 977             | 30.3  |
| 2nd                               | 94                   | 12.3  | 226                 | 29.5  | 48                   | 11.9  | 100                 | 22.5  | 159                 | 46.2  | 87                   | 17.3  | 714             | 22.1  |
| 3rd                               | 192                  | 25.0  | 187                 | 24.4  | 64                   | 15.9  | 103                 | 23.1  | 44                  | 12.8  | 143                  | 28.4  | 733             | 22.7  |
| Highest                           | 183                  | 23.9  | 262                 | 34.2  | 138                  | 34.2  | 43                  | 9.7   | 32                  | 9.3   | 147                  | 29.2  | 805             | 24.9  |
| Total                             | 767                  | 100.0 | 767                 | 100.0 | 403                  | 100.0 | 445                 | 100.0 | 344                 | 100.0 | 503                  | 100.0 | 3229            | 100.0 |
| Household religion                |                      |       |                     |       |                      |       |                     |       |                     |       |                      |       |                 |       |
| Islam                             | 223                  | 21.2  | 10                  | 1.4   | 28                   | 4.5   | 195                 | 73.1  | 195                 | 45.8  | 449                  | 46.9  | 1529            | 100   |
| Christianity                      | 813                  | 77.3  | 695                 | 97.2  | 580                  | 93.5  | 229                 | 26.8  | 229                 | 53.8  | 498                  | 52    | 3044            | 100   |
| Other                             | 16                   | 1.5   | 10                  | 1.4   | 12                   | 1.9   | 2                   | 0.1   | 1                   | 0.5   | 11                   | 1.1   | 52              | 100   |
| Total                             | 1052                 | 100   | 715                 | 100   | 620                  | 100   | 426                 | 100   | 854                 | 100   | 958                  | 100   | 4625            | 100   |
| Household head's                  |                      |       |                     |       |                      |       |                     |       |                     |       |                      |       |                 |       |
| • Gender: Male                    | 1012                 | 88.1  | 715                 | 91.4  | 623                  | 83.8  | 903                 | 98.5  | 716                 | 98.9  | 1104                 | 96.8  | 5073            | 93.0  |
| Female                            | 137                  | 11.9  | 67                  | 8.6   | 120                  | 16.2  | 14                  | 1.5   | 8                   | 1.1   | 37                   | 3.2   | 383             | 7.0   |
| Total                             | 1149                 | 100.0 | 782                 | 100.0 | 743                  | 100.0 | 917                 | 100.0 | 724                 | 100.0 | 1141                 | 100.0 | 5456            | 100.0 |
| • Age (years): Mean               | 42.3                 |       | 40.4                |       | 42.8                 |       | 38.6                |       | 38.7                |       | 44.9                 |       | 41.8            |       |
| *SD                               | 13.7                 |       | 9.9                 |       | 14.4                 |       | 7.6                 |       | 9.3                 |       | 14.9                 |       | 12.7            |       |
| • Family size                     |                      |       |                     |       |                      |       |                     |       |                     |       |                      |       |                 |       |
| Mean                              | 4.7                  |       | 5.4                 |       | 5.4                  |       | 6.5                 |       | 5.1                 |       | 5.4                  |       | 5.4             |       |
| *SD                               | 2.4                  |       | 2.3                 |       | 2.7                  |       | 3.4                 |       | 3.9                 |       | 2.8                  |       | 3.0             |       |

\*SD, Standard deviation
