# Supplementary material for: Utilization of insecticide-treated nets by under-five children in Nigeria: Assessing progress towards the Abuja targets
Source: Springer Nature journal article supplement (doi:10.1186/1475-2875-7-145), 2008-07-30
Supplement: Additional file 2 [file 1475-2875-7-145-s2.pdf]

## Household ownership of mosquito nets by background characteristic.

Households with at least one and more than one mosquito net (treated or untreated), and households that have at least one or more than one Insecticide Treated Net (ITN), by background characteristic

| Background characteristic         | At least one net (n=1193) |      |           | P-value for $\chi^2$ | More than one net (n=543) |      |            | P-value for $\chi^2$ | At least one ITN (n=501) |      |            | P-value for $\chi^2$ | More than one ITN (n=235) |          |                | P-value for $\chi^2$ | Number of households* (n=5588) |
|-----------------------------------|---------------------------|------|-----------|----------------------|---------------------------|------|------------|----------------------|--------------------------|------|------------|----------------------|---------------------------|----------|----------------|----------------------|--------------------------------|
|                                   | % (n)                     | RR   | 95% CI    |                      | % (n)                     | RR   | 95% CI     |                      | % (n)                    | RR   | 95% CI     |                      | % (n)                     | RR       | 95% CI         |                      |                                |
| <i>Residence</i>                  |                           |      |           |                      |                           |      |            |                      |                          |      |            |                      |                           |          |                |                      |                                |
| Urban                             | 19.9 (348)                | 1.00 |           | <0.0001              | 6.4 (112)                 | 1.00 |            | <0.0001              | 9.4 (164)                | 1.00 |            | 0.657                | 3.4 (60)                  | 1.00     |                | 0.037                | 1752                           |
| Rural                             | 25.0 (769)                | 1.26 | 1.13-1.41 |                      | 12.2 (374)                | 1.90 | 1.55-2.33  |                      | 9.8 (300)                | 1.04 | 0.87-1.25  |                      | 4.7 (144)                 | 1.38     | 1.02-1.84      |                      | 3076                           |
| Total                             | 23.1 (1117)               |      |           |                      | 10.1 (486)                |      |            |                      | 9.6 (464)                |      |            |                      | 4.2 (204)                 |          |                |                      | 4828                           |
| <i>Household religion</i>         |                           |      |           |                      |                           |      |            |                      |                          |      |            |                      |                           |          |                |                      |                                |
| Islam                             | 26.5 (387)                | 1.00 |           | 0.001                | 46.6 (214)                | 1.00 |            |                      | 10.9 (159)               | 1.00 |            |                      | 6.5 (95)                  | 1.00     |                |                      | 1458                           |
| Christianity                      | 22.8 (662)                | 0.12 | 0.10-0.13 |                      | 8.4 (244)                 | 0.18 | 0.15-0.21  | <0.0001              | 9.8 (285)                | 0.11 | 0.09-0.13  | 0.084                | 3.6 (104)                 | 0.18     | 0.13-0.24      |                      | 2909                           |
| Other                             | 8.0 (4)                   | 0.33 | 0.13-1.22 |                      | 0.2 (1)                   | 0.73 | 0.13-29.12 |                      | 0.2 (1)                  | 0.55 | 0.10-21.67 |                      | 0.0 (0)                   | $\infty$ | 0.09- $\infty$ |                      | 50                             |
| Total                             | 23.8 (1053)               | 1.00 |           |                      | 10.4 (459)                |      |            |                      | 10.1 (445)               |      |            |                      | 4.5 (199)                 |          |                |                      | 4417                           |
| <i>Region</i>                     |                           |      |           |                      |                           |      |            |                      |                          |      |            |                      |                           |          |                |                      |                                |
| South west                        | 15.9 (182)                | 1.00 |           | <0.0001              | 5.8 (66)                  | 1.00 |            | <0.0001              | 9.6 (110)                | 1.00 |            | <0.0001              | 4.6 (53)                  | 1.00     |                | <0.0001              | 1144                           |
| South east                        | 36.5 (261)                | 2.30 | 1.95-2.71 |                      | 15.4 (110)                | 2.66 | 1.99-3.57  |                      | 11.9 (85)                | 1.23 | 0.95-1.62  |                      | 4.2 (30)                  | 0.91     | 0.69-1.79      |                      | 715                            |
| South south                       | 10.8 (78)                 | 0.11 | 0.53-0.87 |                      | 2.8 (20)                  | 0.48 | 0.29-0.78  |                      | 4.0 (29)                 | 0.42 | 0.28-0.62  |                      | 0.3 (2)                   | 0.72     | 0.01-0.24      |                      | 723                            |
| North west                        | 32.8 (287)                | 2.06 | 1.75-2.43 |                      | 21.9 (192)                | 3.80 | 2.91-4.95  |                      | 9.8 (86)                 | 1.02 | 0.78-1.33  |                      | 8.5 (74)                  | 1.82     | 1.30-2.57      |                      | 876                            |
| North east                        | 41.1 (176)                | 2.59 | 2.17-3.08 |                      | 21.0 (90)                 | 3.65 | 2.71-4.91  |                      | 24.7 (105)               | 2.55 | 2.00-3.25  |                      | 9.6 (41)                  | 2.07     | 1.40-3.06      |                      | 428**                          |
| North central                     | 19.0 (209)                | 1.19 | 1.00-1.43 |                      | 5.9 (65)                  | 1.03 | 0.74-1.43  |                      | 7.8 (86)                 | 1.02 | 0.78-1.33  |                      | 3.2 (35)                  | 0.69     | 0.45-1.04      |                      | 1099                           |
| Total                             | 23.9 (1193)               |      |           |                      | 10.9 (543)                |      |            |                      | 10.1 (501)               |      |            |                      | 4.7 (235)                 |          |                |                      | 4985                           |
| <i>Combined wealth index</i>      |                           |      |           |                      |                           |      |            |                      |                          |      |            |                      |                           |          |                |                      |                                |
| Lowest                            | 24.1 (271)                | 1.00 |           | 0.038                | 13.3 (150)                | 1.00 |            | 0.009                | 9.1 (102)                | 1.00 |            | 0.048#               | 5.7 (64)                  | 1.00     |                | 0.141                | 1126                           |
| 2nd Quartile                      | 23.8 (275)                | 1.01 | 0.85-1.12 |                      | 11.4 (131)                | 1.17 | 0.92-1.50  |                      | 11.0 (127)               | 0.82 | 0.63-1.08  |                      | 5.0 (58)                  | 1.13     | 0.78-1.64      |                      | 1154                           |
| 3rd Quartile                      | 21.6 (303)                | 1.12 | 0.94-1.32 |                      | 9.3 (131)                 | 1.43 | 1.12-1.82  |                      | 8.7 (122)                | 1.04 | 0.79-1.37  |                      | 3.8 (53)                  | 1.50     | 1.03-2.21      |                      | 1404                           |
| Highest                           | 26.3 (342)                | 0.91 | 0.78-1.07 |                      | 10.0 (130)                | 1.30 | 1.05-1.70  |                      | 11.4 (148)               | 0.79 | 0.61-1.03  |                      | 4.5 (59)                  | 1.25     | 0.86-1.81      |                      | 1298                           |
| Total                             | 23.9 (1191)               |      |           |                      | 10.9 (542)                |      |            |                      | 10.0 (499)               |      |            |                      | 4.7 (234)                 |          |                |                      | 4982                           |
| <i>Urban wealth index (n=348)</i> |                           |      |           |                      |                           |      |            |                      |                          |      |            |                      |                           |          |                |                      |                                |
| Lowest                            | 19.8 (86)                 | 1.00 |           | 0.003                | 7.4 (32)                  | 1.00 |            | 0.154                | 7.8 (34)                 | 1.00 |            | 0.038                | 2.8 (12)                  | 1.00     |                | 0.019                | 435                            |
| 2nd Quartile                      | 16.8 (88)                 | 1.18 | 0.87-1.60 |                      | 4.8 (25)                  | 1.50 | 0.89-2.70  |                      | 8.6 (45)                 | 0.91 | 0.57-1.50  |                      | 2.9 (15)                  | 0.97     | 0.41-2.21      |                      | 525                            |
| 3rd Quartile                      | 17.7 (68)                 | 1.12 | 0.80-1.54 |                      | 5.7 (22)                  | 1.28 | 0.72-2.32  |                      | 8.3(32)                  | 0.94 | 0.56-1.57  |                      | 2.3 (9)                   | 1.18     | 0.50-3.20      |                      | 384                            |
| Highest                           | 26.0 (106)                | 0.76 | 0.57-1.02 |                      | 8.1 (33)                  | 0.86 | 0.50-1.43  |                      | 13.0 (53)                | 0.60 | 0.38-0.94  |                      | 5.9 (24)                  | 0.47     | 0.20-0.98      |                      | 408                            |
| Total                             | 19.9 (348)                |      |           |                      | 6.4 (112)                 |      |            |                      | 9.4 (164)                |      |            |                      | 3.4 (60)                  |          |                |                      | 1752                           |
| <i>Rural wealth index (n=769)</i> |                           |      |           |                      |                           |      |            |                      |                          |      |            |                      |                           |          |                |                      |                                |
| Lowest                            | 18.1 (166)                | 1.00 |           | <0.0001              | 10.6 (97)                 | 1.00 |            | 0.017                | 7.2 (66)                 | 1.00 |            | <0.0001              | 5.1 (47)                  | 1.00     |                | 0.122                | 917                            |
| 2nd Quartile                      | 30.1 (203)                | 0.60 | 0.49-0.74 |                      | 14.8 (100)                | 0.71 | 0.53-0.95  |                      | 13.5 (91)                | 0.53 | 0.38-0.74  |                      | 5.9 (40)                  | 0.87     | 0.56-1.35      |                      | 675                            |
| 3rd Quartile                      | 24.4 (172)                | 0.74 | 0.60-0.92 |                      | 10.2 (72)                 | 1.04 | 0.76-1.43  |                      | 8.9 (63)                 | 0.81 | 0.56-1.16  |                      | 4.1 (29)                  | 1.25     | 0.77-2.05      |                      | 705                            |
| Highest                           | 29.1 (226)                | 0.62 | 0.51-0.76 |                      | 13.4 (104)                | 0.79 | 0.59-1.05  |                      | 10.1 (78)                | 0.72 | 0.51-1.01  |                      | 3.5 (27)                  | 1.47     | 0.90-2.46      |                      | 776                            |
| Total                             | 25.0 (767)                |      |           |                      | 12.1 (373)                |      |            |                      | 9.7 (298)                |      |            |                      | 4.7 (143)                 |          |                |                      | 3073                           |

\*Analysis was done for households without missing data

\*\*Missing 42% of data

P-value significant at <0.05

#P-value for Fisher's exact test
